# Supplementary material for: An Unprecedented Challenge: The North Italian Gastroenterologist Response to COVID-19
Source: MDPI journal article supplement (doi:10.3390/jcm11010109), 2021-12-25
Supplement: s1 [file s1]

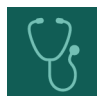

Article

# An Unprecedented Challenge: The North Italian Gastroenterologist Response to COVID-19

Gian Eugenio Tontini <sup>1,2,\*</sup>, Giovanni Aldinio <sup>1,2</sup>, Nicoletta Nandi <sup>1,2</sup>, Alessandro Rimondi <sup>1,2</sup>, Dario Consonni <sup>3</sup>, Massimo Iavarone <sup>4</sup>, Paolo Cantù <sup>2</sup>, Angelo Sangiovanni <sup>4</sup>, Pietro Lampertico <sup>2,4</sup> and Maurizio Vecchi <sup>1,2</sup>

<sup>1</sup> Gastroenterology and Endoscopy Unit, Fondazione IRCCS Ca' Granda Ospedale Maggiore Policlinico, Milan, 20100, Italy; giovanni.aldinio@unimi.it (G.A.); nicoledda.nandi@unimi.it (N.N.); alessandro.rimondi@unimi.it (A.R.); maurizio.vecchi@unimi.it (M.V.)

<sup>2</sup> Department of Pathophysiology and Organ Transplantation, University of Milan, Milan, 20100, Italy; paolo.cantu@policlinico.mi.it (P.C.); pietro.lampertico@unimi.it (P.L.)

<sup>3</sup> Epidemiology Unit, Fondazione IRCCS Ca' Granda Ospedale Maggiore Policlinico, Milan, 20100, Italy; dario.consonni@policlinico.mi.it

<sup>4</sup> Gastroenterology and Hepatology Unit, Fondazione IRCCS Ca' Granda Ospedale Maggiore Policlinico, Milan, 20100, Italy; massimo.iavarone@policlinico.mi.it (M.I.); angelo.sangiovanni@policlinico.mi.it (A.S.)

\* Correspondence: gianeugeniotontini@gmail.com

## Supplementary file

### *Supplementary methods*

Safety protocols adopted in the gastroenterological ward during the SARS-CoV-2 outbreaks:

- Isolation measures (from March 23, 2020): no entry to non-inpatients; single room for “grey” patients (i.e., those who had only one negative RT-PCR test for SARS-CoV-2 at the admission or with respiratory symptoms while being admitted for less than 5 days); optimization of the healthcare personnel to avoid crowding in the common rooms.
- Active surveillance measures (from March 30, 2020): systematic testing of asymptomatic healthcare personnel and inpatients (before their entrance in the wards, then one and three times per week, respectively).
- Personal protective equipment (PPE): systematic adoption of PPE (i.e., FFP1 mask, gloves, single-use scrub suit) at the ward entrance (from March 13, 2020); systematic adoption of second-level single use PPE (i.e., FFP2 mask plus single-use FFP1 mask, double-gloving, visor, waterproof single-use scrub suit) while visiting each “grey” patient (from March 23, 2020) and the subsequent systematic adoption of the same second-level single use PPE while visiting all the patients (from April 3, 2020).

## Supplementary figures

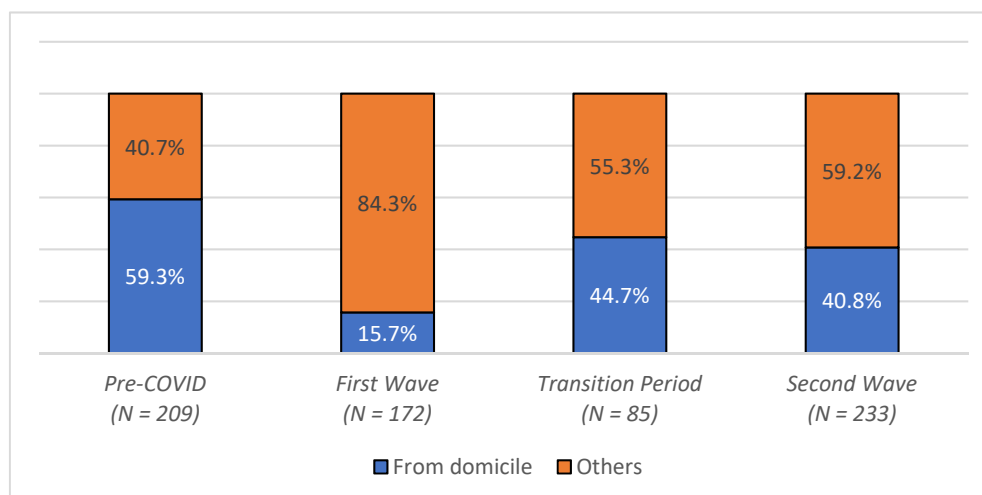

**Figure S1.** Modalities of access. Respect to the pre-COVID era, for each period (first wave, transition period and second wave), the results are: PR 0.26, 95% CI 0.18 to 0.38; PR 0.75, 95% CI 0.58 to 0.98; PR 0.69, 95% CI 0.57 to 0.83.

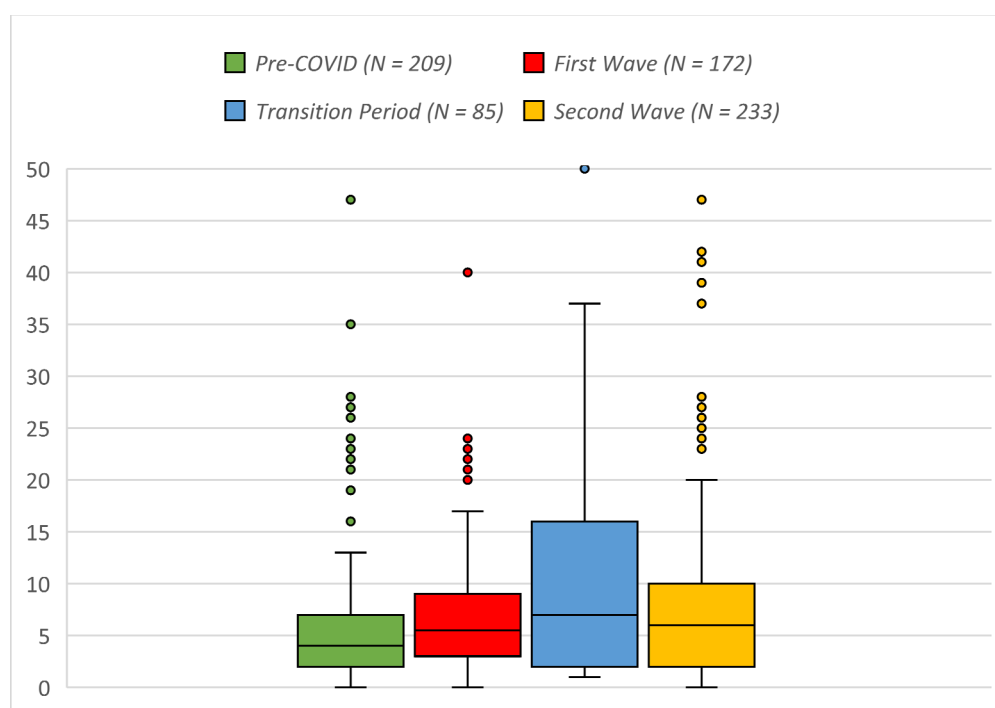

**Figure S2.** Length of stay in the Gastroenterological Unit. Note that patients >50 days are not represented (out of scale).  $p = 0.001$ . The circles are the outliers.

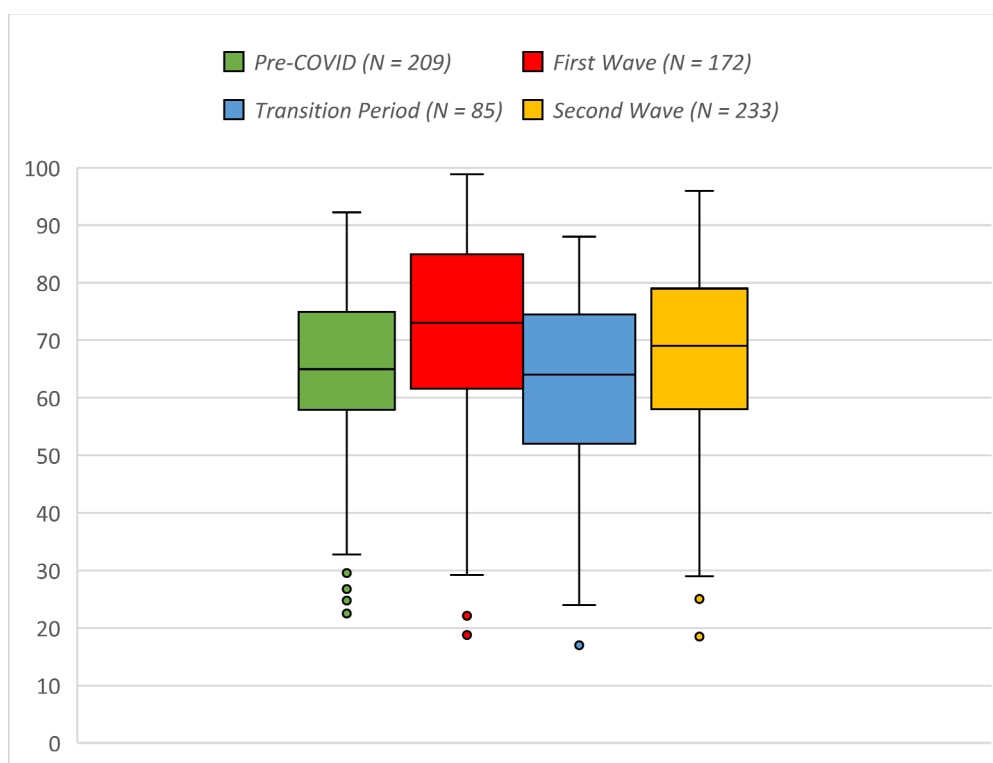

**Figure S3.** Age at the admission.  $p < 0.001$ . The circles are the outliers.

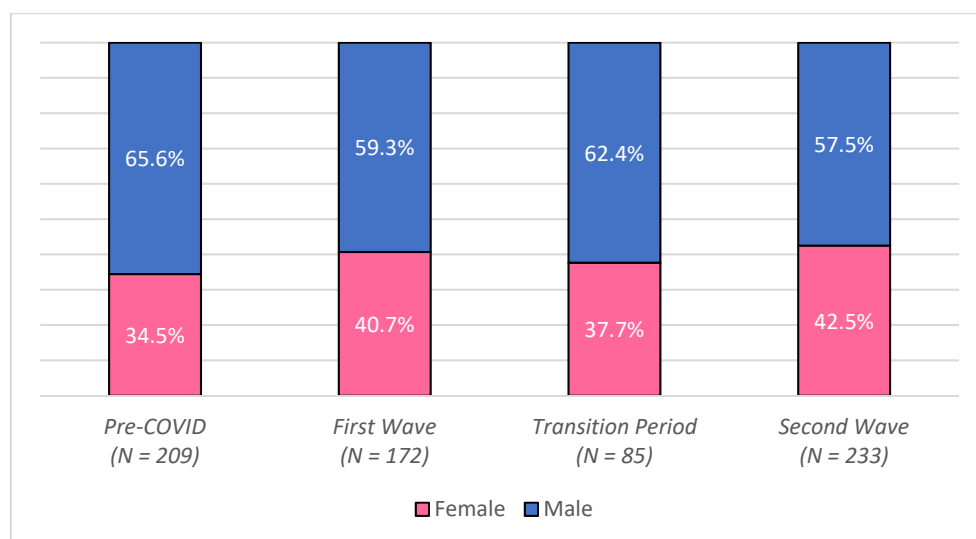

**Figure S4.** Gender distribution; Respect to the pre-COVID era, for each period (first wave, transition period and second wave), the results are: PR 0.90, 95% CI 0.77 to 1.06; PR 0.95, 95% CI 0.78 to 1.15; PR 0.88, 95% CI 0.76 to 1.02.

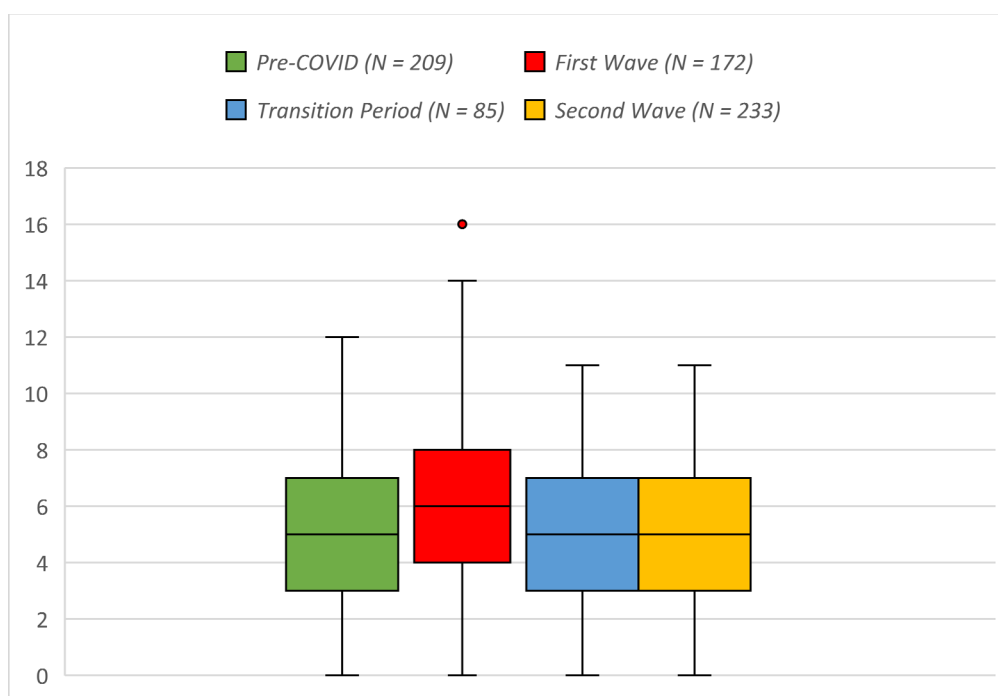

**Figure S5.** Charlson comorbidity index.  $p = 0.02$ . The circles are the outliers.

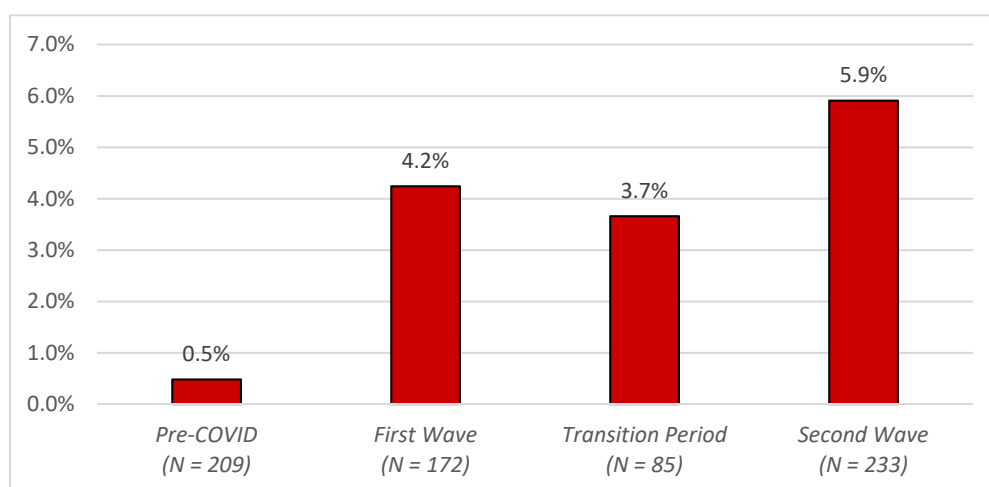

**Figure S6.** Mortality. Respect to the pre-COVID era, for each period (first wave, transition period and second wave), the results are: PR 8.51, 95% CI 1.06 to 68.5; PR 7.38, 95% CI 0.78 to 69.9; PR 11.66, 95% CI 1.54 to 88.4.

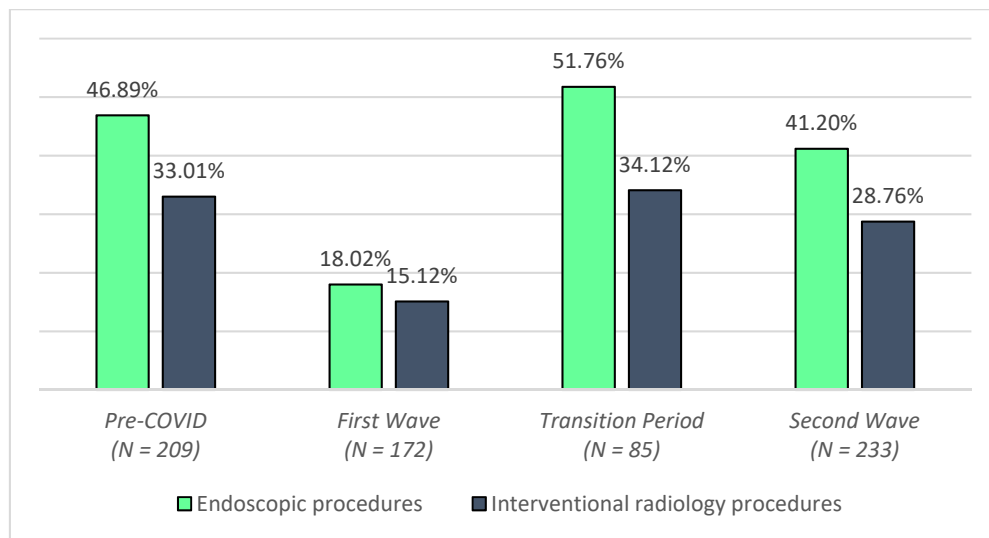

**Figure S7.** Patients attending at least one diagnostic procedure. Respect to the pre-COVID era, for each period (first wave, transition period and second wave), the results related to the endoscopic procedures are: PR 0.38; 95% CI 0.27 to 0.55; PR 1.10; 95% CI 0.86 to 1.42; PR 0.88; 95% CI 0.71 to 1.08. Respect to the pre-COVID era, for each period (first wave, transition period and second wave), the results the results related to the interventional radiology procedures are: PR 0.46; 95% CI 0.31 to 0.69; PR 1.03; 95% CI 0.73 to 1.47; PR 0.87; 95% CI 0.66 to 1.15.

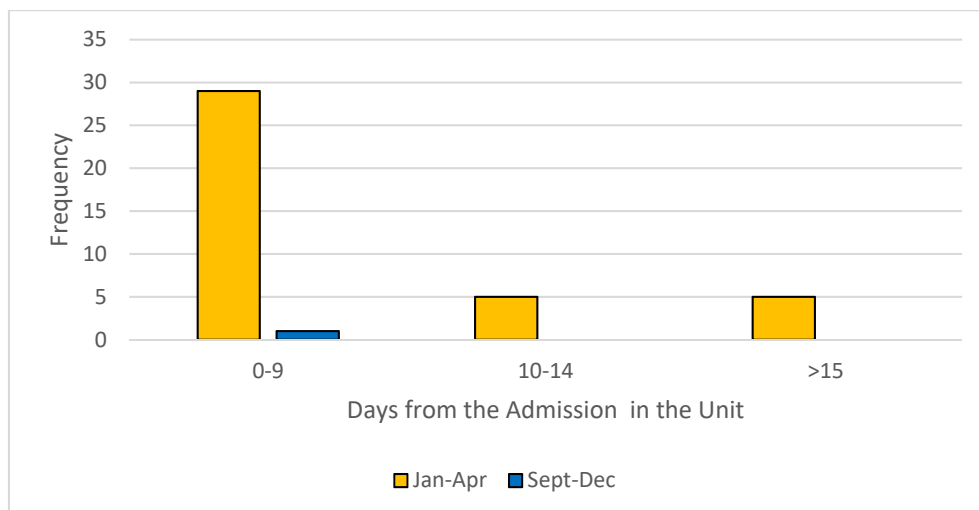

**Figure S8.** Days from admission to diagnosis of SARS-CoV-2 infection.

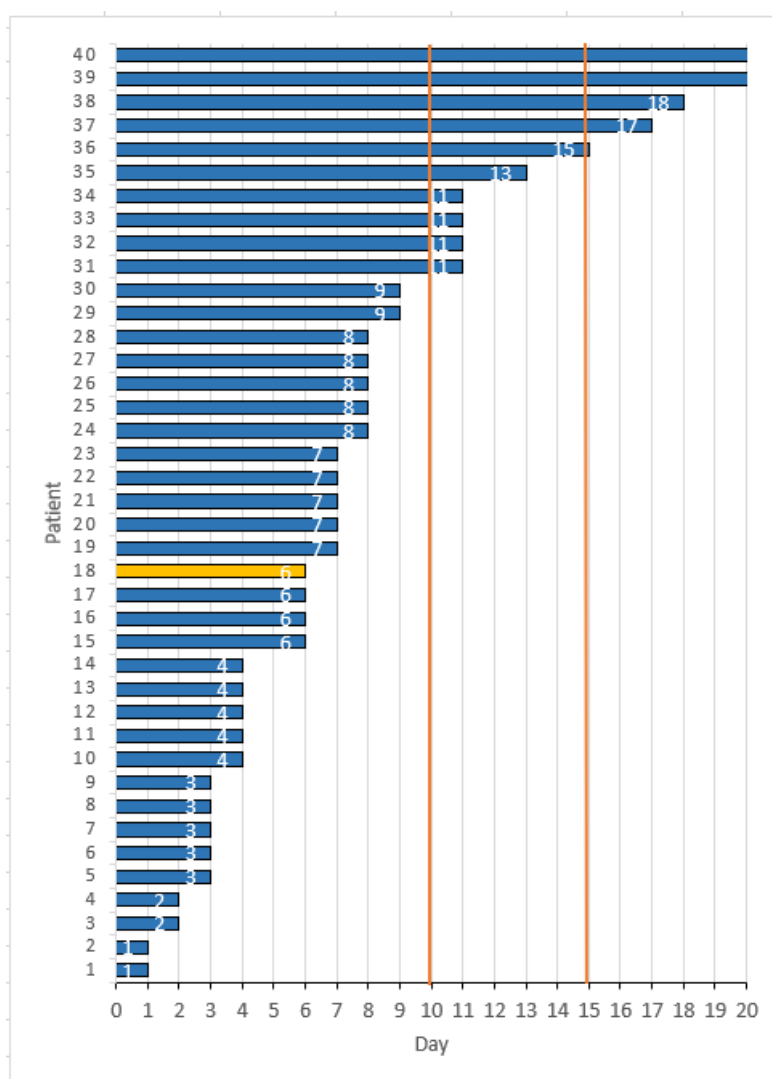

**Figure S9.** Days from the admission in the Gastroenterological Unit to the diagnosis of COVID-19 shown for each case. The orange vertical lines divide the patients into three categories (0-9, 10-14 and >15 days). In yellow, the only patient resulted positive during the second wave.

#### Supplementary tables

**Table S1.** Discharge diagnoses of deceased patients.

| Diagnosis at the discharge                  | No. of deaths |
|---------------------------------------------|---------------|
| <b>Pre-COVID era</b>                        |               |
| Advanced gallbladder cancer                 | 1             |
| <b>First wave</b>                           |               |
| Congestive heart failure                    | 2             |
| Pneumonia                                   | 2             |
| Metastatic hepatocellular carcinoma         | 2             |
| Peritoneal carcinomatosis of unknown origin | 1             |
| <b>Transition period</b>                    |               |
| Sepsis                                      | 1             |
| Acute alcoholic hepatitis                   | 1             |
| Sepsis and cholangiocarcinoma               | 1             |
| <b>Second wave</b>                          |               |
| Refractory celiac disease and lymphoma      | 1             |

|                                           |   |
|-------------------------------------------|---|
| Hepatocellular carcinoma                  | 1 |
| Cachexia and pancreatic necrosis          | 1 |
| Renal failure                             | 2 |
| Septic shock                              | 1 |
| Hepatic abscess and chronic cholecystitis | 1 |
| Aspiration pneumonia                      | 1 |
| Metastatic lung cancer                    | 1 |
| Hepatocellular carcinoma                  | 1 |
| Pneumonia and metastatic prostate cancer  | 1 |
| Liver failure                             | 1 |
| Pneumonia                                 | 1 |

**Table S2.** Days from the admission to the Unit to the diagnosis of COVID-19 during the first wave.

| Days  | N. of patients | %     |
|-------|----------------|-------|
| 0-9   | 29             | 74.4% |
| 10-14 | 5              | 12,8% |
| ≥15   | 5              | 12,8% |
